# Supplementary material for: Glycan Elongation Beyond the Mucin Associated Tn Antigen Protects Tumor Cells from Immune-Mediated Killing
Source: PubMed Central journal article supplement (PMC3765166; doi:10.1371/journal.pone.0072413), 2013-09-06

A

Capan-1 proliferation

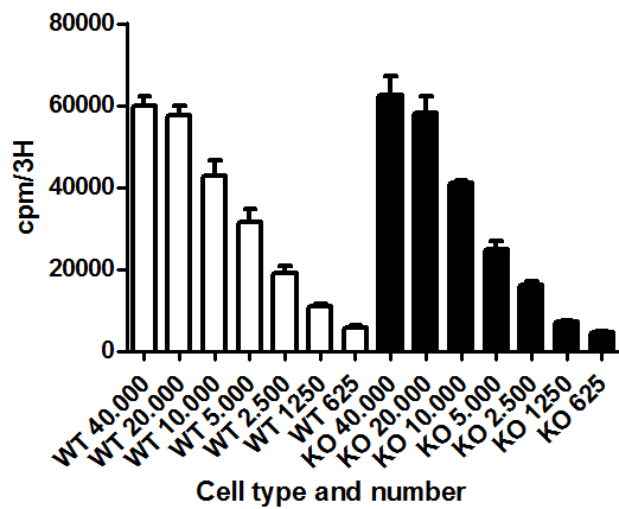

B

T47D proliferation

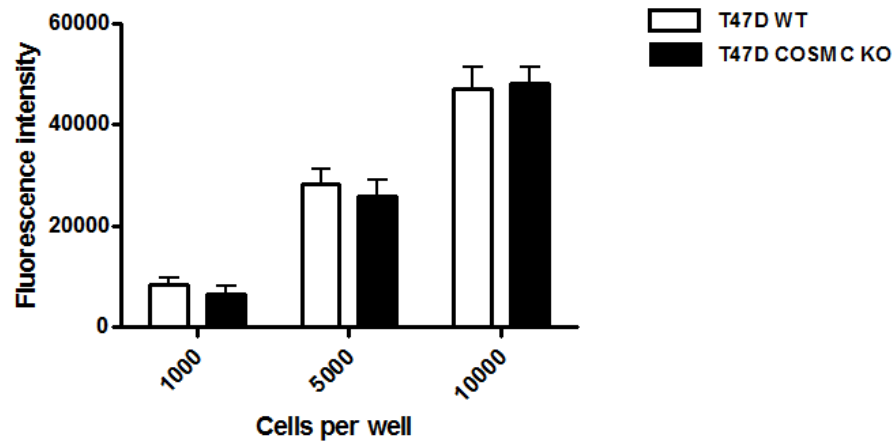

Supplement: pone.0072413.s003.pdf [file pone.0072413.s003.pdf]
