# Supplementary material for: Glycan Elongation Beyond the Mucin Associated Tn Antigen Protects Tumor Cells from Immune-Mediated Killing
Source: PubMed Central journal article supplement (PMC3765166; doi:10.1371/journal.pone.0072413), 2013-09-06

## Donor A

### ADCC Capan-1 transient COSMC rescue

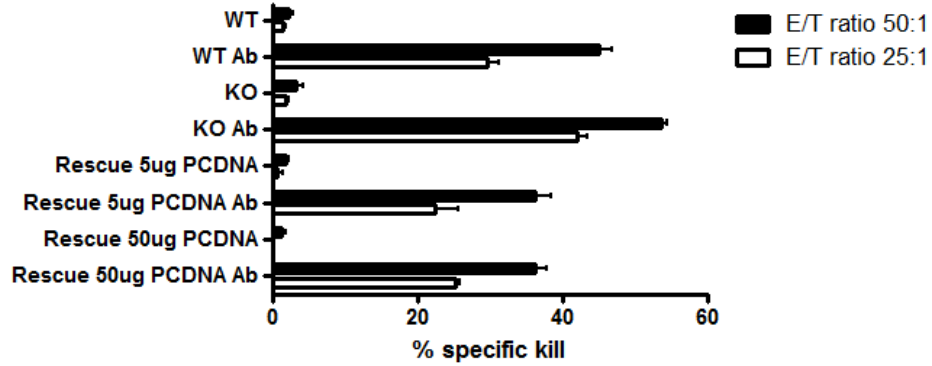

## Donor B

### ADCC Capan-1 transient COSMC rescue

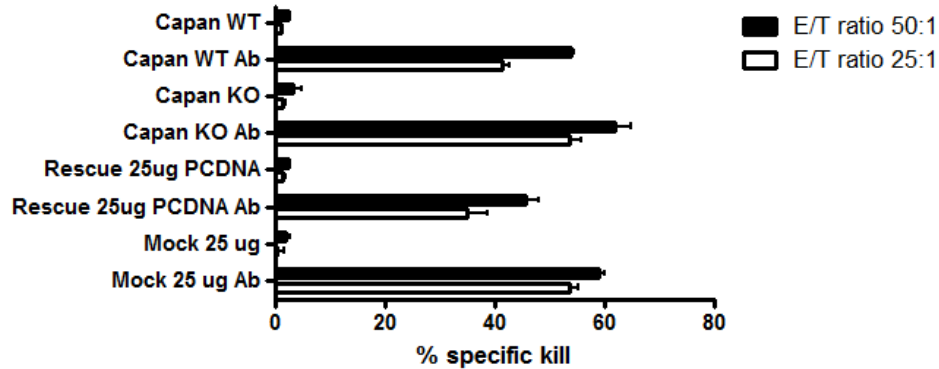

Supplement: pone.0072413.s005.pdf [file pone.0072413.s005.pdf]
