# Supplementary material for: Glycan Elongation Beyond the Mucin Associated Tn Antigen Protects Tumor Cells from Immune-Mediated Killing
Source: PubMed Central journal article supplement (PMC3765166; doi:10.1371/journal.pone.0072413), 2013-09-06

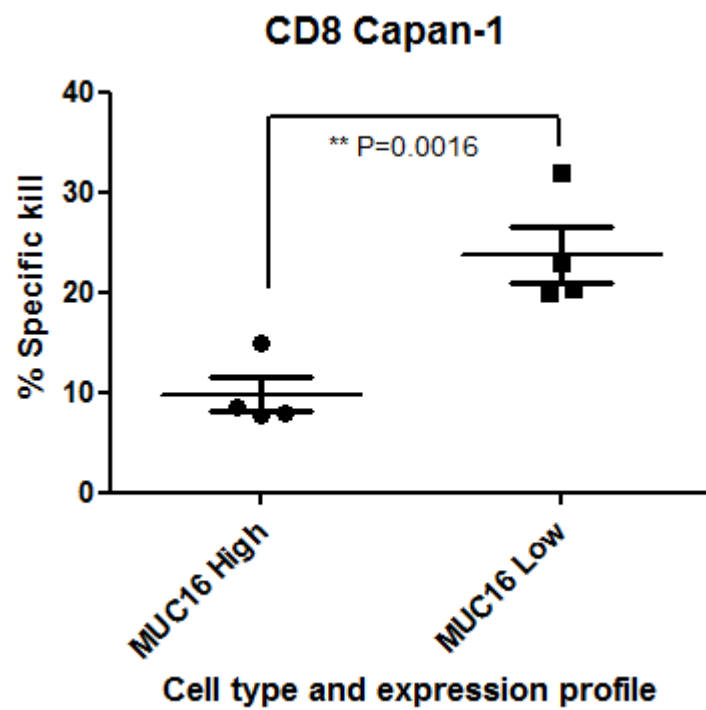

Supplement: pone.0072413.s007.pdf [file pone.0072413.s007.pdf]
