# Supplementary material for: Glycan Elongation Beyond the Mucin Associated Tn Antigen Protects Tumor Cells from Immune-Mediated Killing
Source: PubMed Central journal article supplement (PMC3765166; doi:10.1371/journal.pone.0072413), 2013-09-06
Supplement: pone.0072413.s008.pdf [file pone.0072413.s008.pdf]

## % specific kill E:T 50:1 for individual donors

| Cell line | Modification   | 1        | 2         | 3        |        |         |           |         | Mean         |
|-----------|----------------|----------|-----------|----------|--------|---------|-----------|---------|--------------|
| T47D      | WT             | 9,1      | 13,6      | 13,9     |        |         |           |         | 12,2         |
|           | COSMC KO       | 12,5     | 18,6      | 19,7     |        |         |           |         | 16,9         |
|           | P-value        | **0,0036 | *0,035    | *0,019   |        |         |           |         | *0,0215      |
| Cell line | Modification   | 4        | 5         | 6        | 7      | 8       | 9         | 10      |              |
| Capan-1   | WT             | 13,2     | 45,1      | 10,3     | 21,2   | 42,8    | 28,2      | 15,3    | 25,2         |
|           | COSMC KO       | 20,2     | 53,8      | 17,9     | 24,9   | 50,3    | 37,3      | 25,4    | 32,8         |
|           | P-value        | **0,002  | <0,0001   | <0,0001  | *0,044 | *0,0264 | ***0,0003 | <0,0001 | **** <0,0001 |
| Cell line | Modification   | 11       | 12        | 13       |        |         |           |         |              |
| Capan-1   | WT             | 13,3     | 48,9      | 39,4     |        |         |           |         | 33,9         |
|           | COSMC KO       | 27,6     | 61,5      | 57,2     |        |         |           |         | 48,8         |
|           | WT + neu       | 18,5     | 100,5     | 72,3     |        |         |           |         | 63,6         |
|           | COSMC KO + neu | N/A      | 79,6      | 66,9     |        |         |           |         | 73,25        |
|           | P-value WT     | 0,0002   | <0,0001   | <0,0001  |        |         |           |         | N/S P= 0,15  |
|           | P-value KO     | N/A      | ***0,0007 | **0,0027 |        |         |           |         | N/A          |
